## Correction

# Correction: Causes and Outcomes of Acute Liver Failure in China

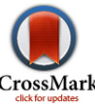**The PLOS ONE Staff**

There are errors in Tables 1 and 2. The “>” symbol was removed while this article was being prepared for publication during the production process. The symbol was also removed in the text “HE grade ( $\leq$ II and  $>$ II)” in the paragraphs preceding each table. Please see the correct tables below.

---

**Citation:** The PLOS ONE Staff (2014) Correction: Causes and Outcomes of Acute Liver Failure in China. PLoS ONE 9(5): e98428. doi:10.1371/journal.pone.0098428

**Published** May 16, 2014

**Copyright:** © 2014 The PLOS ONE Staff. This is an open-access article distributed under the terms of the Creative Commons Attribution License, which permits unrestricted use, distribution, and reproduction in any medium, provided the original author and source are credited.

**Table 1.** Baseline characteristics of patients with acute liver failure on admission and comparison of variables between patients who survived and died.

| Parameters                                          | Patients who survived (n = 65) | Patients who died (n = 112) | P value |
|-----------------------------------------------------|--------------------------------|-----------------------------|---------|
| Sex (male/female)                                   | 33/32                          | 49/63                       | 0.37    |
| Age (years)                                         | 40.0 (31.0)                    | 46.0 (31.5)                 | 0.03    |
| Etiologies                                          |                                |                             | 0.26    |
| Drug (non-herb) toxicity                            | 18                             | 29                          |         |
| Herbs                                               | 12                             | 18                          |         |
| Indeterminate cause                                 | 13                             | 39                          |         |
| Viral causes                                        | 10                             | 10                          |         |
| Other causes                                        | 12                             | 16                          |         |
| Grade of HE                                         |                                |                             | <0.01   |
| ≤II                                                 | 57                             | 31                          |         |
| >II                                                 | 8                              | 81                          |         |
| Days from onset of illness to the development of HE | 11 (15)                        | 10 (15)                     | 0.30    |
| Serum ALT (U/L)                                     | 796 (1817)                     | 756 (1162)                  | 0.90    |
| Serum AST (U/L)                                     | 392.0 (1244.5)                 | 534.0 (824.0)               | 0.43    |
| Serum ALP (U/L)                                     | 162 (83)                       | 165 (87)                    | 0.85    |
| Serum TBil (μmol/L)                                 | 326.35 ± 161.32                | 357.57 ± 152.70             | 0.76    |
| Serum albumin (g/L)                                 | 29 (6)                         | 28 (8)                      | 0.06    |
| Serum cholinesterase (U/L)                          | 2964 (2045)                    | 2895 (1997)                 | 0.33    |
| Serum LDH (U/L)                                     | 264.0 (164.0)                  | 366.5 (486.0)               | <0.01   |
| Serum creatinine (μmol/L)                           | 84.5 (38.0)                    | 88.0 (57.0)                 | 0.25    |
| Serum urea nitrogen (mmol/L)                        | 4.00 (4.25)                    | 3.9 (5.3)                   | 0.48    |
| Serum glucose (mmol/L)                              | 5.15 (3.13)                    | 5.85 (4.00)                 | 0.06    |
| Serum Na <sup>+</sup> (mmol/L)                      | 137 (6)                        | 135 (8)                     | 0.08    |
| Serum K <sup>+</sup> (mmol/L)                       | 3.74 ± 0.59                    | 3.86 ± 0.70                 | 0.29    |
| Serum Cl <sup>-</sup> (mmol/L)                      | 102.9 (6.9)                    | 100.5 (8.6)                 | 0.14    |
| White blood cell count (×10 <sup>9</sup> )          | 8.35 (5.42)                    | 10.45 (8.61)                | 0.11    |
| Platelet count (×10 <sup>9</sup> )                  | 122 (106)                      | 87 (102)                    | 0.01    |
| Hemoglobin (g/L)                                    | 116.5 (34.0)                   | 118.7 (36.5)                | 0.37    |
| PTA (%)                                             | 30.00 (17.21)                  | 16.97 (13.70)               | <0.01   |
| INR                                                 | 1.78 (0.91)                    | 3.39 (1.64)                 | <0.01   |
| Arterial BLA (μmol/L)                               | 70.50 (28.15)                  | 153.50 (62.00)              | <0.01   |
| Arterial blood lactate (mmol/L)                     | 2.75(2.25)                     | 3.40(5.05)                  | 0.42    |
| Arterial blood pH                                   | 7.47 (0.08)                    | 7.48 (0.07)                 | 0.63    |

HE, hepatic encephalopathy; ALT, alanine aminotransferase; AST, aspartate aminotransferase; ALP, alkaline phosphatase; TBil, total bilirubin; LDH, lactate dehydrogenase; PTA, prothrombin activity; INR, international normalized ratio; BLA, blood ammonia.  
doi:10.1371/journal.pone.0080991.t001

**Table 2.** A model for prediction of the death in acute liver failure using entry variables.

| Parameters                | Odds ratio | 95% CI for Odds ratio | P value |
|---------------------------|------------|-----------------------|---------|
| Age (years)               | 1.064      | 1.015-1.115           | 0.01    |
| Grade of HE (>II vs. ≤II) | 7.459      | 1.024-54.327          | 0.04    |
| INR                       | 10.019     | 2.530-39.677          | <0.01   |
| Arterial BLA (μmol/L)     | 1.035      | 1.004-1.067           | 0.02    |

Somers'D 0.951; Goodman-Kruskal Gamma 0.951; Kendall's Tau-a 0.438; concordance index 0.976.  
HE, hepatic encephalopathy; INR, international normalized ratio; BLA, blood ammonia; CI, confidence interval.  
doi:10.1371/journal.pone.0080991.t002

## Reference

1. Zhao P, Wang C, Liu W, Chen G, Liu X, et al. (2013) Causes and Outcomes of Acute Liver Failure in China. *PLoS ONE* 8(11): e80991. doi:10.1371/journal.pone.0080991
